# Supplementary material
Source: PubMed Central journal article supplement (PMC5834695)
Supplement: pnas.201716937SI.pdf [file pnas.201716937SI.pdf]

# Supporting Information

Franz et al. 10.1073/pnas.1716937115

## SI Materials and Methods

**Antibodies, Plasmids, and siRNAs.** The antibodies used were anti-STING (Cell Signaling Technology), anti- $\beta$ -actin (Sigma), anti-SeV (Meridian Life Science), anti-NS1 (from ref. 59), anti-T3D (gift from M. Nibert, Harvard Medical School, Boston), anti-puromycin (EMD Millipore), anti-eIF2 $\alpha$  (Cell Signaling Technology), anti-phospho-eIF2 $\alpha$  (Cell Signaling Technology), anti-VSV M (Kerafast), K1 [anti-poly(I:C)] (Scicons), and anti-HA (Sigma).

The shCTRL plasmid was a gift from D. Sabatini, Whitehead Institute for Biomedical Research, Cambridge, MA (Addgene plasmid no. 1864), and shSTING and mcGAS plasmid were gifts from Z. Chen, University of Texas Southwestern Medical Center, Dallas. In vitro-transcribed mRNA was cloned using sequences from pcDNA3 RLUC POLIRES FLUC and was a gift from N. Sonenberg, McGill University, Montreal (Addgene plasmid no. 45642). VSV-FIRESR and in vitro-transcribed mRNA were cloned using sequences from pFR\_CrPV\_xb and were a gift from P. Sharp, Massachusetts Institute of Technology, Cambridge, MA (Addgene plasmid no. 11509). MSCV LC3-GFP, MSCV STING-HA, and pSTING were cloned within the laboratory.

The siRNAs targeting STING and the nontargeted control were purchased from Qiagen, and siRNA targeting MAVS was purchased from Life Technologies. RNA depletion was achieved by transfecting 20 nM siRNAs using Lipofectamine RNAiMAX (Invitrogen).

**Cell Culture and Lentivirus Transduction.** MEFs (spontaneously immortalized), 293T, and Veros were maintained in DMEM complete media supplemented with 10% FBS and cultured according to standard techniques. MAVS KO and matched control MEFs were a gift from Z. Chen, University of Texas Southwestern Medical Center, Dallas. Primary RIG-I KO and matched control MEFs were a gift from M. Gale, University of Washington, Seattle, and primary STING KO and matched control MEFs were a gift from A. Poltorak, Tufts University School of Medicine, Boston. RIG-I/MDA5 KO MEFs were a gift from S. Akira, Osaka University, Osaka. STING-HA allele and LC3-GFP were introduced into cells by retroviral vector transduction. shCTRL and shSTING were introduced into cells by lentiviral vector transduction.

**Inhibitors and Ligands.** Inhibitors and ligands used in this study were ISRIB (1  $\mu$ M; Sigma), actinomycin D (5  $\mu$ g/mL; Sigma), cycloheximide (10  $\mu$ g/mL; Sigma), P6 (5  $\mu$ M; Calbiochem), and DMSO (Sigma). High-molecular weight poly(I:C) (Invivogen) and herring testes DNA (Sigma) were transfected into cells with Lipofectamine 2000 (Thermo Fisher Scientific).

For senescence assays, shCTRL and shSTING MEFs were incubated with 10  $\mu$ M BrdU for 12 h before cells were fixed. BrdU staining was performed using a BrdU Flow Kit (BD Biosciences) according to the manufacturer's protocol. Cells were

analyzed via flow cytometry on a BD FACSCanto II (Becton Dickinson) and analyzed using FlowJo v10 (FlowJo, LLC).

Senescence  $\beta$ -galactosidase staining was performed according to the manufacturer's protocol (Cell Signaling Technology). Data were acquired using a Nikon TS100 Eclipse light microscope, and images were acquired using NIS Elements (Nikon Instruments) software.

**cGAMP Activity Assay.** To test for cGAMP activity, cells were homogenized in hypotonic buffer (10 mM Tris-HCl, pH 7.4, 10 mM KCl, 1.5 mM MgCl<sub>2</sub>). Lysates were centrifuged at 100,000  $\times g$  for 20 min. Supernatants were incubated at 95  $^{\circ}$ C for 5 min and centrifuged at 12,000  $\times g$  for 5 min. Supernatants were recovered and treated with 1 U/uL of benzonase (EMD Millipore) for 30 min at 37  $^{\circ}$ C followed by 100  $\mu$ g/mL of Proteinase K (Thermo Fisher Scientific) for 60 min at 50  $^{\circ}$ C. The supernatant was incubated at 95  $^{\circ}$ C for 5 min and then cooled to 25  $^{\circ}$ C (10). The supernatant was mixed with 10 $\times$  digitonin permeabilization solution (50 mM Hepes, pH 7.0, 100 mM KCl, 3 mM MgCl<sub>2</sub>, 0.1 mM DTT, 85 mM Sucrose, 0.2% BSA, 1 mM ATP, 0.1 mM GTP,  $\pm$ 10  $\mu$ g/mL Digitonin) to achieve a 1 $\times$  digitonin permeabilization solution (60). The buffer was incubated with MEFs for 20 min at 37  $^{\circ}$ C. The digitonin permeabilization solution was then aspirated from the cells and replaced with normal growth media. RNA was isolated from the MEFs 8 h later, and *Irfb1* transcript was analyzed.

**Immunofluorescence.** For immunofluorescence analysis, cells were fixed with 2% paraformaldehyde in PBS for 15 min at 25  $^{\circ}$ C. Cells were permeabilized with 0.1% Triton X in PBS for 10 min before incubating overnight in block buffer (2% goat serum, 50 mM ammonium chloride in PBS) at 4  $^{\circ}$ C. The indicated antibodies were diluted in block buffer and incubated with the cells overnight at 4  $^{\circ}$ C. Antibody binding was detected by secondary antibodies conjugated to AlexaFluor 488 or 568 (ThermoFisher Scientific). Nuclei were stained with DRAQ5 (Thermo Scientific). Confocal images were acquired using a spinning disk confocal head (CSU-X1; Perkin-Elmer Co.) coupled to a fully motorized inverted Zeiss Axiovert 200M microscope equipped with a 63 $\times$  lens (Pan Aplanachromat, 1.4 N.A.). The imaging system operates under control of SlideBook 6 (Intelligent Imaging Innovations Inc.).

**Statistical Analysis.** Statistical analysis of viral growth curves was performed as described (61). All statistical analysis was done in Prism 7 (GraphPad Software, Inc.). Except where noted, all statistical analysis was carried out by unpaired Student's *t* test, with *P* < 0.05 considered statistically significant. When performing statistical analysis on viral titers, statistical analysis was done on the log transform of the data.



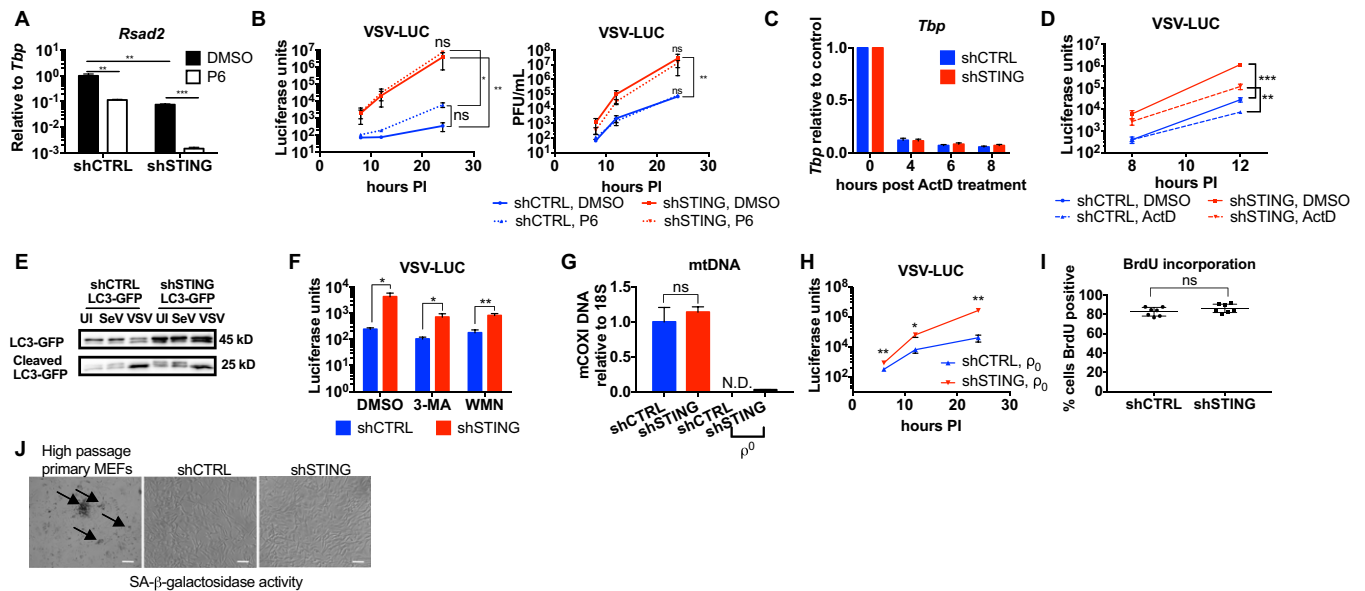

**Fig. S2.** Mechanistic analysis of STING-dependent restriction of VSV replication. (A) The MEFs indicated were incubated with P6 or DMSO for 24 h. *Rsad2* transcripts were analyzed by qRT-PCR. Data are represented as mean  $\pm$  SEM. (B) P6- and DMSO-treated cells were infected with VSV-LUC (MOI 0.1) and monitored by luciferase assay at the indicated time after infection (Left). VSV-LUC titer was determined by pfu assay (pfu/mL) at the indicated time post-infection (Right). Data are represented as mean  $\pm$  SEM. (C) The MEFs indicated were treated with DMSO or actinomycin D (ActD). *Tbp* transcripts were analyzed by qRT-PCR at the times indicated. Level of *Tbp* is represented as the ratio between *Tbp* in ActD-treated cells at the indicated time and *Tbp* in DMSO-treated cells at time 0. Data are represented as mean  $\pm$  SEM. (D) The MEFs indicated were treated with DMSO or ActD for 30 min and then infected in the presence of drug with VSV-LUC at MOI 0.1. Virus replication was monitored by luciferase assay at the indicated time after infection. Data are represented as mean  $\pm$  SEM. (E) The MEFs indicated were transfected with a vector expressing LC3-GFP. Cells were infected with WT VSV at MOI 1.0 or SeV at 250 HAU/mL for 8 h. Lysates were separated by SDS/PAGE. LC3-GFP was detected with a GFP antibody. (F) The MEFs indicated were treated with DMSO, 3-MA, or WMN for 30 min and then infected in the presence of drug with VSV-LUC at MOI 0.1. Virus replication was monitored by luciferase activity assay 8 h after infection. Data are represented as mean  $\pm$  SEM. (G) The mitochondrial DNA gene mCOX1 was analyzed by qPCR for the indicated cell lines and is represented relative to 18S DNA. Data are represented as mean  $\pm$  SEM. (H)  $\rho^0$ - and mock-treated cells were infected with VSV-LUC at MOI 0.1. N.D., not detected. (I) Virus replication was monitored by luciferase assay at the indicated time postinfection. Data are represented as mean  $\pm$  SEM. (J) The MEFs indicated were incubated with BrdU for 12 h. BrdU incorporation was measured by flow cytometry. Data represent independently cultured replicates. (J) Images of shCTRL, shSTING, and primary MEFs 30 d in culture, stained for SA- $\beta$ -gal activity. (Scale bar, 100  $\mu$ m). Arrows highlight positive stained cells. ns, not significant; \* $P$  < 0.05; \*\* $P$  < 0.01; \*\*\* $P$  < 0.0001 (Student's *t* test).



AHA MFI of all populations was determined. Data are shown as percent MFI of mock-transfected cells. Data are represented as mean  $\pm$  SEM. (E, Left) WT and RIG-I/MDA5 KO MEFs were treated with DMSO or thapsigargin for 6 h. Cells were incubated with 15  $\mu$ g/mL puromycin for 15 min. Lysates were separated by SDS/PAGE, and actin and puromycin were detected by specific antibodies. Puromycin signal was quantified as in C. (E, Right) Lysates were separated by SDS/PAGE, and phospho-eIF2 $\alpha$  and total eIF2 $\alpha$  were detected by specific antibodies. ns, not significant.

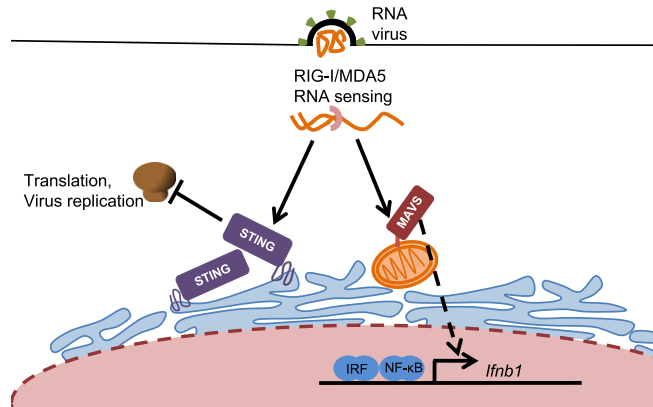

**Fig. S4.** STING restricts translation to control RNA virus replication. During infections of WT fibroblasts, RIG-I and/or MDA5 activate IFN through MAVS and inhibit translation through STING. In the absence of STING, IFN responses remain high, but viruses gain access to translation machinery and replicate efficiently.

**Table S1. Viruses used in this study**

| Virus name            | Genome type          | Family                  | Viral replication subcellular location |
|-----------------------|----------------------|-------------------------|----------------------------------------|
| VSV                   | (-) ssRNA            | <i>Rhabdoviridae</i>    | Cytoplasm                              |
| SINV                  | (+) ssRNA            | <i>Togaviridae</i>      | Cytoplasm, on endosomes                |
| SeV                   | (-) ssRNA            | <i>Paramyxoviridae</i>  | Cytoplasm                              |
| Influenza A PR8 (IAV) | (-) ssRNA, segmented | <i>Orthomyxoviridae</i> | Nucleus                                |
| Reovirus T3D (Reo)    | dsRNA, segmented     | <i>Reoviridae</i>       | Cytoplasm                              |

ssRNA denotes single-stranded RNA genome; dsRNA denotes dsRNA genome. (+) denotes genome is positive-sense; (-) denotes genome is negative-sense. Unless noted, genomes are nonsegmented.
